# Supplementary material
Source: PubMed Central journal article supplement (PMC6581536)
Supplement: EMS82959-supplement-SuppMatt.pdf [file EMS82959-supplement-SuppMatt.pdf]

**Supplementary data:**

| <b>Table S1: result of group comparisons of proteins levels</b> |                                                   |                                              |
|-----------------------------------------------------------------|---------------------------------------------------|----------------------------------------------|
|                                                                 | <i>Plasma Protein</i>                             | <i>p value</i>                               |
| <b>Cross-sectional</b>                                          | Apolipoprotein A-II (Apo A-II) (ng/ml)            | 0.0002                                       |
|                                                                 | Brain Natriuretic Peptide (BNP) (pg/ml)           | 0.0008                                       |
|                                                                 | Placenta Growth Factor (PLGF) (pg/ml)             | 0.0008                                       |
|                                                                 | Apolipoprotein E (Apo E) (ug/ml)                  | 0.0013                                       |
|                                                                 | Alpha-1-Microglobulin (A1Micro) (ug/ml)           | 0.0034                                       |
|                                                                 | Interleukin-16 (IL-16) (pg/mL)                    | 0.0034                                       |
|                                                                 | Serum Glutamic Oxaloacetic Transaminase (ug/mL)   | 0.0034                                       |
|                                                                 | Immunoglobulin M (IGM) (mg/mL)                    | 0.0038                                       |
|                                                                 | Peptide YY (PYY) (pg/mL)                          | 0.0040                                       |
|                                                                 | Eotaxin-3 (pg/mL)                                 | 0.0067                                       |
|                                                                 | Tenascin-C (TN-C) (ng/mL)                         | 0.0067                                       |
|                                                                 | Alpha-2-Macroglobulin (A2Macro) (mg/mL)           | 0.0196                                       |
|                                                                 | Receptor for advanced glycosylation end (ng/mL)   | 0.0224                                       |
|                                                                 | Transthyretin (TTR) (mg/dl)                       | 0.0224                                       |
|                                                                 | Pancreatic Polypeptide (PPP) (pg/ml)              | 0.0239                                       |
|                                                                 | Vitronectin (ug/ml)                               | 0.0404                                       |
|                                                                 | Pregnancy-Associated Plasma Protein A (P (mIU/mL) | 0.0412                                       |
|                                                                 | Thyroxine-Binding Globulin (TBG) (ug/mL)          | 0.0430                                       |
|                                                                 |                                                   |                                              |
|                                                                 | <b>Longitudinal</b>                               | Matrix Metalloproteinase-10 (MMP-10) (ng/ml) |
| Angiotensin-Converting Enzyme (ACE) (ng/ml)                     |                                                   | <0.0001                                      |
| Alpha-1-Microglobulin (A1Micro) (ug/ml)                         |                                                   | <0.0001                                      |

|                                                  |         |
|--------------------------------------------------|---------|
| Apolipoprotein A-II (Apo A-II) (ng/ml)           | <0.0001 |
| TNF-Related Apoptosis-Inducing Ligand Re (ng/mL) | <0.0001 |
| Factor VII (ng/mL)                               | <0.0001 |
| AXL Receptor Tyrosine Kinase (AXL) (ng/mL)       | <0.0001 |
| Kidney Injury Molecule-1 (KIM-1) (ng/ml)         | <0.0001 |
| Transthyretin (TTR) (mg/dl)                      | <0.0001 |
| Intercellular Adhesion Molecule 1 (ICAM- (ng/mL) | <0.0001 |
| Interleukin-3 (IL-3) (ng/mL)                     | <0.0001 |
| Placenta Growth Factor (PLGF) (pg/ml)            | <0.0001 |
| Sortilin (ng/mL)                                 | <0.0001 |
| Fibroblast Growth Factor 4 (FGF-4) (pg/mL)       | <0.0001 |
| Bone Morphogenetic Protein 6 (BMP-6) (ng/mL)     | <0.0001 |
| Trefoil Factor 3 (TFF3) (ug/ml)                  | <0.0001 |
| Apolipoprotein D (Apo D) (ug/ml)                 | <0.0001 |
| Thymus-Expressed Chemokine (TECK) (ng/mL)        | 0.0001  |
| Tumor Necrosis Factor Receptor-Like 2 (T (ng/mL) | 0.0001  |
| Matrix Metalloproteinase-9 (MMP-9) (ng/mL)       | 0.0002  |
| Macrophage Inflammatory Protein-3 alpha (pg/ml)  | 0.0003  |
| Interleukin-16 (IL-16) (pg/mL)                   | 0.0004  |
| Monokine Induced by Gamma Interferon (MI (pg/ml) | 0.0005  |
| C-peptide (ng/ml)                                | 0.0006  |
| T Lymphocyte-Secreted Protein I-309 (I-3 (pg/mL) | 0.0007  |
| Testosterone- Total (ng/ml)                      | 0.0007  |
| Ciliary Neurotrophic Factor (CNTF) (pg/mL)       | 0.0007  |
| Vascular Cell Adhesion Molecule-1 (VCAM- (ng/mL) | 0.0011  |

|                                                  |        |
|--------------------------------------------------|--------|
| L eptin (ng/mL)                                  | 0.0018 |
| Neuronal Cell Adhesion Molecule (Nr-CAM) (ng/mL) | 0.0022 |
| Creatine Kinase-MB (CK-MB) (ng/mL)               | 0.0025 |
| Cancer Antigen 19-9 (CA-19-9) (U/mL)             | 0.0026 |
| CD40 Ligand (CD40-L) (ng/mL)                     | 0.0029 |
| Epidermal Growth Factor Receptor (EGFR) (ng/mL)  | 0.0031 |
| Apolipoprotein C-III (Apo C-III) (ug/mL)         | 0.0043 |
| Fatty Acid-Binding Protein- heart (FABP) (ng/mL) | 0.0045 |
| Immunoglobulin E (IgE) (ng/mL)                   | 0.0053 |
| Follicle-Stimulating Hormone (FSH) (mIU/mL)      | 0.0061 |
| Peptide YY (PYY) (pg/mL)                         | 0.0063 |
| Chemokine CC-4 (HCC-4) (ng/mL)                   | 0.0064 |
| Epidermal Growth Factor (EGF) (pg/mL)            | 0.0073 |
| Resistin (ng/ml)                                 | 0.0076 |
| Insulin-like Growth Factor-Binding Prote (ng/mL) | 0.0086 |
| Interleukin-13 (IL-13) (pg/mL)                   | 0.0087 |
| E-Selectin (ng/mL)                               | 0.0096 |
| Myoglobin (ng/mL)                                | 0.0105 |
| Eotaxin-3 (pg/mL)                                | 0.0195 |
| von Willebrand Factor (vWF) (ug/mL)              | 0.0195 |
| Heparin-Binding EGF-Like Growth Factor ( (pg/mL) | 0.0203 |
| Superoxide Dismutase 1- Soluble (SOD-1) (ng/mL)  | 0.0245 |
| Eotaxin-1 (pg/mL)                                | 0.0300 |
| Agouti-Related Protein (AGRP) (pg/mL)            | 0.0314 |
| Prolactin (PRL) (ng/ml)                          | 0.0314 |

|                                                  |        |
|--------------------------------------------------|--------|
| Apolipoprotein(a) (Lp(a)) (ug/mL)                | 0.0377 |
| Monocyte Chemotactic Protein 3 (MCP-3) (pg/mL)   | 0.0391 |
| B Lymphocyte Chemoattractant (BLC) (pg/ml)       | 0.0392 |
| Serum Glutamic Oxaloacetic Transaminase (ug/mL)  | 0.0421 |
| Ferritin (FRTN) (ng/mL)                          | 0.0464 |
| Pulmonary and Activation-Regulated Chemo (ng/mL) | 0.0464 |
| Stem Cell Factor (SCF) (pg/mL)                   | 0.0464 |
| Tissue Inhibitor of Metalloproteinases 1 (ng/mL) | 0.0464 |
| Apolipoprotein A-I (Apo A-I) (mg/mL)             | 0.0466 |

| <b>Table S2: Cross sectional mean protein concentration</b> |     |    |       |       |      |
|-------------------------------------------------------------|-----|----|-------|-------|------|
| Group                                                       |     | N  | Mean  | SD    | SEM  |
| Alpha-2-Macroglobulin (A2Macro) (mg/mL)                     | HC  | 49 | 0.02  | 0.11  | 0.02 |
|                                                             | AD↑ | 85 | 0.08  | 0.09  | 0.01 |
| Brain Natriuretic Peptide (BNP) (pg/ml)                     | HC  | 49 | 2.76  | 0.37  | 0.05 |
|                                                             | AD↑ | 85 | 3.06  | 0.33  | 0.04 |
| Eotaxin-3 (pg/mL)                                           | HC  | 49 | 2.37  | 0.42  | 0.06 |
|                                                             | AD↑ | 85 | 2.62  | 0.24  | 0.03 |
| Immunoglobulin M (IgM) (mg/mL)                              | HC  | 49 | 0.38  | 0.25  | 0.04 |
|                                                             | AD↓ | 85 | 0.21  | 0.24  | 0.03 |
| Interleukin-16 (IL-16) (pg/mL)                              | HC  | 49 | 2.62  | 0.12  | 0.02 |
|                                                             | AD↓ | 85 | 2.53  | 0.14  | 0.02 |
| Pancreatic Polypeptide (PPP) (pg/ml)                        | HC  | 49 | 1.98  | 0.32  | 0.05 |
|                                                             | AD↑ | 85 | 2.17  | 0.37  | 0.04 |
| Peptide YY (PYY) (pg/mL)                                    | HC  | 49 | 1.86  | 0.30  | 0.04 |
|                                                             | AD↑ | 85 | 2.08  | 0.34  | 0.04 |
| Thyroxine-Binding Globulin (TBG) (ug/mL)                    | HC  | 49 | 1.76  | 0.10  | 0.01 |
|                                                             | AD↑ | 85 | 1.81  | 0.09  | 0.01 |
| Apolipoprotein A-II (Apo A-II) (ng/ml)                      | HC  | 49 | 2.78  | 0.10  | 0.01 |
|                                                             | AD↓ | 85 | 2.69  | 0.09  | 0.01 |
| Placenta Growth Factor (PLGF) (pg/ml)                       | HC  | 49 | 36.96 | 10.57 | 1.51 |
|                                                             | AD↓ | 85 | 26.89 | 15.40 | 1.67 |
| Apolipoprotein E (Apo E) (ug/ml)                            | HC  | 49 | 1.85  | 0.15  | 0.02 |
|                                                             | AD↓ | 85 | 1.72  | 0.20  | 0.02 |
| Alpha-1-Microglobulin (A1Micro) (ug/ml)                     | HC  | 49 | 1.05  | 0.11  | 0.02 |
|                                                             | AD↑ | 85 | 1.12  | 0.10  | 0.01 |
| Serum Glutamic Oxaloacetic Transaminase (ug/mL)             | HC  | 49 | 3.64  | 1.08  | 0.15 |
|                                                             | AD↓ | 85 | 2.93  | 0.80  | 0.09 |

| <b>Table S3: Longitudinal mean protein concentration change over 1 year</b> |    |    |       |      |      |
|-----------------------------------------------------------------------------|----|----|-------|------|------|
| Group                                                                       |    | N  | Mean  | SD   | SEM  |
| Alpha-1-Microglobulin (A1Micro) (ug/ml)                                     | AD | 85 | -0.08 | 0.09 | 0.01 |
|                                                                             | HC | 49 | 0.04  | 0.09 | 0.01 |
| Angiotensin-Converting Enzyme (ACE) (ng/ml)                                 | AD | 85 | 0.02  | 0.09 | 0.01 |
|                                                                             | HC | 49 | -0.08 | 0.06 | 0.01 |
| Agouti-Related Protein (AGRP) (pg/mL)                                       | AD | 85 | -0.03 | 0.27 | 0.03 |
|                                                                             | HC | 49 | 0.08  | 0.21 | 0.03 |
| Apolipoprotein A-I (Apo A-I) (mg/mL)                                        | AD | 85 | 0.00  | 0.10 | 0.01 |
|                                                                             | HC | 49 | -0.05 | 0.11 | 0.02 |
| Apolipoprotein A-II (Apo A-II) (ng/ml)                                      | AD | 85 | 0.01  | 0.13 | 0.01 |
|                                                                             | HC | 49 | -0.14 | 0.10 | 0.01 |
| Apolipoprotein C-III (Apo C-III) (ug/mL)                                    | AD | 85 | 0.01  | 0.13 | 0.01 |
|                                                                             | HC | 49 | -0.08 | 0.16 | 0.02 |
| Apolipoprotein D (Apo D) (ug/ml)                                            | AD | 85 | -0.09 | 0.09 | 0.01 |
|                                                                             | HC | 49 | 0.00  | 0.11 | 0.02 |
| AXL Receptor Tyrosine Kinase (AXL) (ng/mL)                                  | AD | 85 | -0.02 | 0.08 | 0.01 |
|                                                                             | HC | 49 | -0.09 | 0.07 | 0.01 |
| B Lymphocyte Chemoattractant (BLC) (pg/ml)                                  | AD | 85 | -0.04 | 0.13 | 0.01 |
|                                                                             | HC | 49 | -0.11 | 0.17 | 0.02 |
| Bone Morphogenetic Protein 6 (BMP-6) (ng/mL)                                | AD | 85 | -0.16 | 0.34 | 0.04 |
|                                                                             | HC | 49 | 0.06  | 0.14 | 0.02 |
| Cancer Antigen 19-9 (CA-19-9) (U/mL)                                        | AD | 85 | 0.05  | 0.16 | 0.02 |
|                                                                             | HC | 49 | -0.04 | 0.13 | 0.02 |
| CD40 Ligand (CD40-L) (ng/mL)                                                | AD | 85 | 0.13  | 0.45 | 0.05 |
|                                                                             | HC | 49 | -0.15 | 0.44 | 0.06 |
| Creatine Kinase-MB (CK-MB) (ng/mL)                                          | AD | 85 | -0.10 | 0.20 | 0.02 |
|                                                                             | HC | 49 | 0.03  | 0.20 | 0.03 |
| Ciliary Neurotrophic Factor (CNTF) (pg/mL)                                  | AD | 85 | -0.11 | 0.35 | 0.04 |
|                                                                             | HC | 49 | 0.09  | 0.24 | 0.03 |
| C-peptide (ng/ml)                                                           | AD | 85 | 0.04  | 0.19 | 0.02 |
|                                                                             | HC | 49 | -0.07 | 0.14 | 0.02 |
| Epidermal Growth Factor (EGF) (pg/mL)                                       | AD | 85 | 0.09  | 0.55 | 0.06 |
|                                                                             | HC | 49 | -0.19 | 0.47 | 0.07 |
| Epidermal Growth Factor Receptor (EGFR) (ng/mL)                             | AD | 85 | -0.37 | 0.88 | 0.09 |
|                                                                             | HC | 49 | 0.10  | 0.66 | 0.09 |
| Eotaxin-1 (pg/mL)                                                           | AD | 85 | 0.08  | 0.22 | 0.02 |
|                                                                             | HC | 49 | -0.01 | 0.17 | 0.02 |
| Eotaxin-3 (pg/mL)                                                           | AD | 85 | -0.16 | 0.29 | 0.03 |
|                                                                             | HC | 49 | -0.03 | 0.27 | 0.04 |
| E-Selectin (ng/mL)                                                          | AD | 85 | -0.10 | 1.31 | 0.14 |
|                                                                             | HC | 49 | 0.61  | 1.31 | 0.19 |
| Fatty Acid-Binding Protein- heart (FABP) (ng/mL)                            | AD | 85 | 0.00  | 0.29 | 0.03 |
|                                                                             | HC | 49 | -0.15 | 0.24 | 0.03 |
| Factor VII (ng/mL)                                                          | AD | 85 | 0.00  | 0.14 | 0.02 |
|                                                                             | HC | 49 | -0.11 | 0.07 | 0.01 |

|                                                       |    |    |       |       |      |
|-------------------------------------------------------|----|----|-------|-------|------|
| Fibroblast Growth Factor 4 (FGF-4)<br>(pg/mL)         | AD | 85 | -0.07 | 0.36  | 0.04 |
|                                                       | HC | 49 | 0.19  | 0.23  | 0.03 |
| Ferritin (FRTN) (ng/mL)                               | AD | 85 | -0.07 | 0.23  | 0.03 |
|                                                       | HC | 49 | 0.04  | 0.28  | 0.04 |
| Follicle-Stimulating Hormone (FSH)<br>(mIU/mL)        | AD | 85 | 0.04  | 0.08  | 0.01 |
|                                                       | HC | 49 | -0.02 | 0.11  | 0.02 |
| Heparin-Binding EGF-Like Growth Factor<br>(pg/mL)     | AD | 85 | -0.03 | 0.41  | 0.04 |
|                                                       | HC | 49 | 0.15  | 0.34  | 0.05 |
| Chemokine CC-4 (HCC-4) (ng/mL)                        | AD | 85 | -0.01 | 0.12  | 0.01 |
|                                                       | HC | 49 | -0.07 | 0.09  | 0.01 |
| T Lymphocyte-Secreted Protein I-309 (I-3)<br>(pg/mL)  | AD | 85 | -0.04 | 0.23  | 0.02 |
|                                                       | HC | 49 | 0.09  | 0.14  | 0.02 |
| Intercellular Adhesion Molecule 1 (ICAM-1)<br>(ng/mL) | AD | 85 | -0.01 | 0.12  | 0.01 |
|                                                       | HC | 49 | -0.12 | 0.11  | 0.02 |
| Immunoglobulin E (IgE) (ng/mL)                        | AD | 85 | -0.01 | 0.26  | 0.03 |
|                                                       | HC | 49 | -0.16 | 0.24  | 0.03 |
| Insulin-like Growth Factor-Binding Protein<br>(ng/mL) | AD | 85 | 0.16  | 0.15  | 0.02 |
|                                                       | HC | 49 | 0.24  | 0.14  | 0.02 |
| Interleukin-13 (IL-13) (pg/mL)                        | AD | 85 | 0.01  | 0.19  | 0.02 |
|                                                       | HC | 49 | -0.07 | 0.14  | 0.02 |
| Interleukin-16 (IL-16) (pg/mL)                        | AD | 85 | 0.06  | 0.20  | 0.02 |
|                                                       | HC | 49 | -0.04 | 0.09  | 0.01 |
| Interleukin-3 (IL-3) (ng/mL)                          | AD | 85 | 0.07  | 0.31  | 0.03 |
|                                                       | HC | 49 | -0.27 | 0.36  | 0.05 |
| Kidney Injury Molecule-1 (KIM-1)<br>(ng/ml)           | AD | 85 | -0.28 | 0.27  | 0.03 |
|                                                       | HC | 49 | -0.07 | 0.14  | 0.02 |
| Leptin (ng/mL)                                        | AD | 85 | 0.04  | 0.23  | 0.02 |
|                                                       | HC | 49 | -0.10 | 0.19  | 0.03 |
| Apolipoprotein(a) (Lp(a)) (ug/mL)                     | AD | 85 | -0.03 | 0.15  | 0.02 |
|                                                       | HC | 49 | 0.08  | 0.30  | 0.04 |
| Monocyte Chemoattractant Protein 3 (MCP-3)<br>(pg/mL) | AD | 85 | -0.11 | 0.41  | 0.04 |
|                                                       | HC | 49 | 0.04  | 0.26  | 0.04 |
| Monokine Induced by Gamma Interferon<br>(MI) (pg/ml)  | AD | 85 | 0.07  | 0.15  | 0.02 |
|                                                       | HC | 49 | -0.05 | 0.17  | 0.02 |
| Macrophage Inflammatory Protein-3 alpha<br>(pg/ml)    | AD | 85 | -0.08 | 0.14  | 0.01 |
|                                                       | HC | 49 | 0.03  | 0.16  | 0.02 |
| Matrix Metalloproteinase-10 (MMP-10)<br>(ng/ml)       | AD | 85 | -0.09 | 0.28  | 0.03 |
|                                                       | HC | 49 | -0.44 | 0.20  | 0.03 |
| Matrix Metalloproteinase-9 (MMP-9)<br>(ng/mL)         | AD | 85 | 0.07  | 0.33  | 0.04 |
|                                                       | HC | 49 | -0.13 | 0.20  | 0.03 |
| Myoglobin (ng/mL)                                     | AD | 85 | -0.04 | 0.19  | 0.02 |
|                                                       | HC | 49 | 0.06  | 0.19  | 0.03 |
| Neuronal Cell Adhesion Molecule (N-CAM)<br>(ng/mL)    | AD | 85 | -0.01 | 0.31  | 0.03 |
|                                                       | HC | 49 | -0.14 | 0.09  | 0.01 |
| Pulmonary and Activation-Regulated Chemo<br>(ng/mL)   | AD | 85 | -0.05 | 0.09  | 0.01 |
|                                                       | HC | 49 | -0.08 | 0.08  | 0.01 |
| Placenta Growth Factor (PLGF) (pg/ml)                 | AD | 85 | 11.47 | 19.64 | 2.13 |

|                                                  |    |    |       |       |      |
|--------------------------------------------------|----|----|-------|-------|------|
|                                                  | HC | 49 | -6.77 | 18.18 | 2.60 |
| Prolactin (PRL) (ng/ml)                          | AD | 85 | 0.00  | 0.16  | 0.02 |
|                                                  | HC | 49 | -0.07 | 0.12  | 0.02 |
| Peptide YY (PYY) (pg/mL)                         | AD | 85 | -0.09 | 0.28  | 0.03 |
|                                                  | HC | 49 | 0.08  | 0.30  | 0.04 |
| Resistin (ng/ml)                                 | AD | 85 | 0.03  | 0.15  | 0.02 |
|                                                  | HC | 49 | -0.03 | 0.08  | 0.01 |
| Stem Cell Factor (SCF) (pg/mL)                   | AD | 85 | 0.04  | 0.19  | 0.02 |
|                                                  | HC | 49 | -0.03 | 0.15  | 0.02 |
| Serum Glutamic Oxaloacetic Transaminase (ug/mL)  | AD | 85 | 1.57  | 3.85  | 0.42 |
|                                                  | HC | 49 | 0.47  | 1.25  | 0.18 |
| Superoxide Dismutase 1- Soluble (SOD-1) (ng/mL)  | AD | 85 | 0.02  | 0.28  | 0.03 |
|                                                  | HC | 49 | -0.09 | 0.21  | 0.03 |
| Sortilin (ng/mL)                                 | AD | 85 | 0.03  | 0.10  | 0.01 |
|                                                  | HC | 49 | -0.07 | 0.11  | 0.02 |
| Thymus-Expressed Chemokine (TECK) (ng/mL)        | AD | 85 | -0.03 | 0.11  | 0.01 |
|                                                  | HC | 49 | -0.13 | 0.13  | 0.02 |
| Testosterone- Total (ng/ml)                      | AD | 85 | 0.04  | 0.48  | 0.05 |
|                                                  | HC | 49 | -0.26 | 0.39  | 0.06 |
| Trefoil Factor 3 (TFF3) (ug/ml)                  | AD | 85 | 0.05  | 0.08  | 0.01 |
|                                                  | HC | 49 | -0.03 | 0.10  | 0.01 |
| Tissue Inhibitor of Metalloproteinases 1 (ng/mL) | AD | 85 | -0.01 | 0.10  | 0.01 |
|                                                  | HC | 49 | 0.03  | 0.10  | 0.01 |
| Tumor Necrosis Factor Receptor-Like 2 (T (ng/mL) | AD | 85 | 0.00  | 0.10  | 0.01 |
|                                                  | HC | 49 | 0.08  | 0.09  | 0.01 |
| TNF-Related Apoptosis-Inducing Ligand Re (ng/mL) | AD | 85 | -0.04 | 0.08  | 0.01 |
|                                                  | HC | 49 | -0.13 | 0.07  | 0.01 |
| Transthyretin (TTR) (mg/dl)                      | AD | 85 | -0.03 | 0.13  | 0.01 |
|                                                  | HC | 49 | -0.14 | 0.10  | 0.01 |
| Vascular Cell Adhesion Molecule-1 (VCAM- (ng/mL) | AD | 85 | -0.02 | 0.08  | 0.01 |
|                                                  | HC | 49 | 0.04  | 0.08  | 0.01 |
| von Willebrand Factor (vWF) (ug/mL)              | AD | 85 | -0.37 | 0.58  | 0.06 |
|                                                  | HC | 49 | -0.11 | 0.50  | 0.07 |

| IC | Cluster Size | MNI Coordinates |     |     | Regions                                                                                                                              |
|----|--------------|-----------------|-----|-----|--------------------------------------------------------------------------------------------------------------------------------------|
|    |              | X               | Y   | Z   |                                                                                                                                      |
| A  | 1332         | 28              | -18 | -20 | Left and Right Hippocampus, Left Thalamus, Left and Right Parahippocampal Gyri, Temporal Fusiform Gyri, Posterior Cingulate Cortices |
|    | 1313         | -26             | -18 | -20 |                                                                                                                                      |
|    | 157          | 48              | -56 | 18  |                                                                                                                                      |
|    | 111          | 54              | -42 | 6   |                                                                                                                                      |
|    | 103          | 50              | -44 | -22 |                                                                                                                                      |
|    | 102          | 0               | -32 | 36  |                                                                                                                                      |
|    | 100          | 30              | 42  | 26  |                                                                                                                                      |
| B  | 671          | -22             | -6  | -22 | Left and Right Hippocampus, Amygdala, Parahippocampal Gyri, Temporal Fusiform Cortices, Temporal Poles                               |
|    | 515          | 24              | -4  | -22 |                                                                                                                                      |
|    | 109          | 28              | -6  | -38 |                                                                                                                                      |
| C  | 600          | 24              | 2   | -42 | Left and Right Temporal Fusiform Cortices, Parahippocampal gyri, Temporal poles, and Right Inferior Temporal Gyrus                   |
|    | 352          | -24             | 0   | -40 |                                                                                                                                      |
|    | 137          | 60              | -38 | -16 |                                                                                                                                      |
| D  | 2217         | 62              | -44 | -12 | Right Inferior, Middle and Superior Temporal Gyri, Supramarginal Gyrus, Angular Gyrus                                                |
| E  | 585          | -6              | -22 | 6   | Left and Right Thalamic Nuclei                                                                                                       |
| F  | 367          | -60             | -54 | -4  | Left Middle and Inferior Temporal Gyri, Parahippocampal Gyrus, Temporal Fusiform Cortex                                              |
|    | 258          | -30             | -2  | -44 |                                                                                                                                      |
|    | 352          | -24             | 0   | -40 |                                                                                                                                      |
|    | 137          | 60              | -38 | -16 |                                                                                                                                      |
| G  | 565          | -54             | 0   | -22 | Right Frontal Pole, Left Temporal Pole, Middle/Superior Temporal Gyri                                                                |
|    | 107          | 30              | 50  | 14  |                                                                                                                                      |
| H  | 1570         | 44              | -4  | -44 | Right Temporal Pole, Middle/Inferior Temporal Gyri, Parahippocampal Gyrus, Temporal Fusiform cortex                                  |

| IC | Cluster Size | MNI Coordinates |     |     | Regions                                                                                                                                                 |
|----|--------------|-----------------|-----|-----|---------------------------------------------------------------------------------------------------------------------------------------------------------|
|    |              | X               | Y   | Z   |                                                                                                                                                         |
| A  | 67           | 30              | -44 | -12 | Right Temporal Occipital Fusiform Cortex and Lingual Gyrus                                                                                              |
| B  | 123          | 0               | -8  | 36  | Left and Right Anterior/Posterior Cingulate Gyri                                                                                                        |
| C  | 70           | -28             | -46 | -10 | Left Temporal Occipital Cortices, Lingual Cortices, Temporal Fusiform Cortices and Parahippocampal Gyri                                                 |
| D  | 65           | 20              | -4  | -20 | Left and Right Amygdala                                                                                                                                 |
|    | 13           | -18             | -6  | -20 |                                                                                                                                                         |
| E  | 63           | 16              | 12  | 6   | Right Caudate and Putamen                                                                                                                               |
| F  | 35           | 4               | -18 | 38  | Left and Right Posterior/Anterior Cingulate Gyri, Left Temporal Fusiform Cortices, Left Parahippocampal Gyrus, Right Amygdala and Middle Temporal Gyrus |
|    | 17           | -34             | -34 | -22 |                                                                                                                                                         |
|    | 17           | 30              | 2   | -22 |                                                                                                                                                         |
|    | 12           | 62              | -6  | -18 |                                                                                                                                                         |
| G  | 51           | -12             | 12  | 0   | Left Caudate and Nucleus Accumbens                                                                                                                      |
| H  | 127          | 0               | -30 | 32  | Left and Right Posterior Cingulate Cortices                                                                                                             |
| I  | 83           | -26             | -40 | -16 | Left and Right Temporal Fusiform Cortices, Temporal Occipital Fusiform Cortices, Left Parahippocampal Gyrus and Lingual Gyrus                           |
|    | 12           | 30              | -38 | -18 |                                                                                                                                                         |
| J  | 46           | -16             | 16  | 6   | Left Caudate Nucleus                                                                                                                                    |
| K  | 127          | -16             | 8   | 12  | Left Caudate, Anterior/Posterior Cingulate Gyrus, Right Amygdala                                                                                        |
|    | 14           | -2              | -2  | 36  |                                                                                                                                                         |
|    | 14           | 28              | 2   | -22 |                                                                                                                                                         |
|    | 12           | -2              | -24 | 34  |                                                                                                                                                         |
| L  | 99           | -30             | -50 | -14 | Left and Right Cingulate Gyri, Left Temporal Occipital and Posterior Fusiform Cortex                                                                    |
|    | 68           | 0               | -20 | 34  |                                                                                                                                                         |
